# 1 **Genotypic characterization of the U.S. peanut core** 2 **collection**

3 **Paul I. Otyama<sup>\*†1</sup>, Roshan Kulkarni<sup>\*†1</sup>, Kelly Chamberlin<sup>§</sup>, Peggy Ozias-Akins<sup>\*\*</sup>, Ye Chu<sup>\*\*</sup>, Lori M.**  
4 **Lincoln<sup>††</sup>, Gregory E. MacDonald<sup>‡‡</sup>, Noelle L. Anglin<sup>§§</sup>, Sudhansu Dash<sup>\*\*\*</sup>, David J. Bertoli<sup>\*\*</sup>, David**  
5 **Fernández-Baca<sup>†††</sup>, Michelle A. Graham<sup>††‡</sup>, Steven B. Cannon<sup>††‡</sup>, Ethalinda K.S. Cannon<sup>††</sup>**

6 <sup>1</sup> Contributed equally to this work: Paul I. Otyama, Roshan Kulkarni

7 <sup>\*</sup> Interdepartmental Genetics and Genomics, Iowa State University, Ames, IA, USA

8 <sup>†</sup> ORISE Fellow, Corn Insects and Crop Genetics Research Unit, USDA-ARS, Ames, IA, USA

9 <sup>‡</sup> Agronomy Department, Iowa State University, Ames, IA, USA

10 <sup>§</sup> USDA - Agricultural Research Service, Stillwater, OK, USA

11 <sup>\*\*</sup> Institute of Plant Breeding, Genetics, and Genomics and Department of Horticulture, University of Georgia,  
12 Tifton, GA, USA

13 <sup>††</sup> USDA - Agricultural Research Service, Corn Insects and Crop Genetics Research Unit, Ames, IA, USA

14 <sup>‡‡</sup> University of Florida, Gainesville, FL, USA

15 <sup>§§</sup> International Potato Center, Lima, Peru

16 <sup>\*\*\*</sup> National Center for Genomic Resources, Santa Fe, NM, USA

17 <sup>†††</sup> Department of Computer Science, Iowa State University, Ames, IA, USA

18

19

20

21

22

23

24

25

26

27 **Running title:** Peanut core collection genotyping

28 **Keywords:** peanut, Arachis, genotype, germplasm core collection

29 **Author for correspondence**

30 Ethalinda KS Cannon

31 1018 Crop Genome Informatics Laboratory,

32 819 Wallace Rd, Ames, IA USA 50011-4014

33 Email: [ethy.cannon@ars.usda.gov](mailto:ethy.cannon@ars.usda.gov)

34 [ekcannon@iastate.edu](mailto:ekcannon@iastate.edu)

35 Phone: 515-294-5558

## 36 **Abstract**

37 Cultivated peanut (*Arachis hypogaea*) is an important oil, food, and feed crop worldwide. The  
38 USDA peanut germplasm collection currently contains 8,982 accessions. In the 1990s, 812  
39 accessions were selected as a core collection on the basis of phenotype and country of origin.  
40 The present study reports genotyping results for the entire available core collection. Each  
41 accession was genotyped with the Arachis\_Axiom2 SNP array, yielding 14,430 high-quality,  
42 informative SNPs across the collection. Additionally, a subset of 253 accessions was replicated,  
43 using between two and five seeds per accession, to assess heterogeneity within these accessions.  
44 the genotypic diversity of the core is mostly captured in five genotypic clusters, which have  
45 some correspondence with botanical variety and market type. There is little genetic clustering by  
46 country of origin, reflecting peanut's rapid global dispersion in the 18th and 19th centuries. A  
47 genetic cluster associated with the *hypogaea/aequatoriana/peruviana* varieties, with accessions  
48 coming primarily from Bolivia, Peru, and Ecuador, is consistent with these having been the  
49 earliest landraces. The genetics, phenotypic characteristics, and biogeography are all consistent  
50 with previous reports of tetraploid peanut originating in Southeast Bolivia. Analysis of the  
51 genotype data indicates an early genetic radiation, followed by regional distribution of major  
52 genetic classes through South America, and then a global dissemination that retains much of the  
53 early genetic diversity in peanut. Comparison of the genotypic data relative to alleles from the  
54 diploid progenitors also indicates that subgenome exchanges, both large and small, have been  
55 major contributors to the genetic diversity in peanut.

56 All data is available at the National Ag Library: <https://doi.org/10.15482/USDA.ADC/1518508>  
57 and at PeanutBase: [https://peanutbase.org/data/public/Arachis\\_hypogaea/mixed.esm.KNWW](https://peanutbase.org/data/public/Arachis_hypogaea/mixed.esm.KNWW)

## 58 **Introduction**

59 Cultivated peanut (*Arachis hypogaea*) was domesticated in central South America by early  
60 agriculturalists, following tetraploidization of a hybrid involving the merger of two progenitor  
61 diploid species: *A. duranensis* and *A. ipaënsis* (Bertioli et al. 2016). *A. hypogaea* has been  
62 taxonomically classified into two subspecies, *hypogaea* and *fastigiata*, and several botanical  
63 varieties. A period of several thousand years of domestication and diversification in South  
64 America led to the establishment and dispersal of several distinct botanical types by the time of  
65 Portuguese, Spanish, and Dutch incursion into South America in the 1500s. Establishment of  
66 diverse botanical types prior to European contact is evidenced by archaeological records from  
67 several locations in South America, including the *hypogaea* and *vulgaris* botanical varieties  
68 from regions corresponding with Chile, Argentina, Ecuador, Paraguay, Bolivia, and Brazil  
69 (Krapovickas and Vanni 2009); and *peruviana*, *aequatoriana*, and *hirsuta* varieties from  
70 northern South America - now corresponding with Peru, Bolivia, and Ecuador (Krapovickas  
71 1995). Throughout the colonial period (~1492–1832), peanut cultivation spread quickly around  
72 the world. Peanut is now an important source of protein and oil worldwide. In 2017, the 718,570  
73 hectares in the U.S. produced 47,097,498 metric tons; and worldwide, 28 million hectares  
74 produced 47 million metric tons (<https://www.nass.usda.gov>). As a nitrogen-fixing legume,  
75 peanut is also important as a rotation crop that restores soil nitrogen.

76 The USDA peanut germplasm collection provides an essential source of diverse genetic material  
77 for breeders. The collection, representing peanut introductions from around the world and most  
78 of the ~80 diploid *Arachis* wild relatives, currently contains 8,982 accessions, which are  
79 maintained by the USDA Plant Genetic Resources Conservation Unit in Griffin, GA. As a recent  
80 polyploid that experienced a domestication bottleneck, genetic variation across peanut landraces

81 is expected to be low. Peanut is susceptible to a wide range of pathogens, so breeding for disease  
82 resistance is of paramount importance. Other traits are important breeding targets, including  
83 agronomic traits such as time to maturity and pod-fill, flavor, and nutritional and market traits  
84 such as seed size and oil quality.

85 The U.S. Peanut Core Collection was developed using geographic origin and phenotypic  
86 characteristics to select a representative set of accessions from the US collection that span the  
87 diversity of cultivated peanut (Holbrook et al. 1993). The development of the Affymetrix SNP  
88 array, 'Axiom\_Arachis2' (Clevenger et al. 2018; Korani et al. 2019) enabled low-cost analysis of  
89 this core set through genotyping. The resulting data set will serve multiple purposes: to assess the  
90 genetic diversity of the core collection and its population structure; to provide breeders with  
91 genotype data for each accession; and to generate data that can be used for trait association  
92 (GWAS) analyses. In addition to these expected outcomes, investigation of the phylogenetic and  
93 network characteristics of the collection provide information about the historical spread of  
94 peanut diversity globally.

95 The specific objectives of this study were to 1) provide genotype data for each accession, 2)  
96 assess genetic diversity of the collection, 3) analyze population structure, 4) estimate the  
97 incidence of heterogenous or mixed accessions, and 5) assess relationships between genotypic  
98 groups and common traits and phenotypic classes.

99

## 100 **Materials and Methods**

## 101 **Germplasm material**

102 The U.S. Peanut core collection of 831 accessions was developed in the 1990s. Of these, 44 were  
103 unavailable at the time of this study. This project genotyped the 787 accessions which were  
104 available (Supplementary File S1) and 14 commercial varieties used in many U.S. breeding  
105 programs. These included Tifguard / PI 651853 (Holbrook et al. 2008), Georgia-06G / PI  
106 644220 (Branch 2007b), FloRun 107 / PI 663993 (Tillman and Gorbet 2015), Bailey / PI 659502  
107 (Gorbet and Tillman 2009; Isleib et al. 2011; Tillman and Gorbet 2015), Florida Fancy / PI  
108 654368 / PVP #200800231 (Branch 2007a), Jupiter (Anon. 2000), Tamnut OL 06 / PI 642850  
109 (Baring et al. 2006), OLin / PI 631176 (Simpson et al. 2003), Tamrun OL 11 / PI 665017 (Baring  
110 et al. 2013), Red River Runner / PI 665474 (Melouk et al. 2013), NM309-2 (released as  
111 NuMex-01) / PI 670460 (Puppala and Tallury 2014, Chamberlin et al. 2015), Florida-07 / PI  
112 652938 (Gorbet and Tillman 2009), Tifguard / PI 651853 (Simpson et al. 2003; Holbrook et al.  
113 2008), and OLé (Chamberlin et al. 2015).

114 Each accession was grown to maturity to enable seed collection. The accessions which originated  
115 from Africa were grown by the Ozias-Akins lab in Tifton, GA. The remaining accessions were  
116 grown by the Chamberlin lab in Stillwater, OK. Additionally, we selected 247 accessions for  
117 replicate genotyping to test accession purity. These were grown to seedling stage in Ames, IA.  
118 Of the 253 accessions, 35 were selected based on information from GRIN-Global  
119 (<https://www.grin-global.org>) and previous knowledge of heterogeneity (Otyama et al. 2019).  
120 The remaining 212 were randomly selected to evaluate overall homogeneity of the core  
121 collection (Supplementary File S1).

122 For the replicated genotyping, two seeds were randomly picked from a seed packet of 30 seeds  
123 per selected accession. These were then planted in the greenhouse, on a sand bench, or in a  
124 growth chamber. Not all selected samples germinated (even after replanting), which limited the  
125 number of samples available for replicate genotyping for some accessions. Of the 247  
126 accessions; 197 accessions were genotyped twice, 33 were genotyped three times, 16 accessions  
127 had four samples and one had five samples genotyped. In total, 1145 samples were available for  
128 genotyping.

### 129 **DNA extraction and genotyping**

130 For all accessions, whether grown to maturity or to seedling stage, leaf tissue was sampled  
131 between 2 and 4 weeks after germination and immediately frozen in liquid nitrogen. DNA was  
132 extracted using Qiagen (Germantown, MD) DNeasy 96 Plant Kits (#69181) and 3 mm Tungsten  
133 Carbide Beads (#69997) as recommended by the manufacturer. Initial concentration and purity  
134 of 12 DNA samples/plate was estimated using a Thermo Fisher Scientific® NanoDrop ND-1000  
135 Spectrophotometer (Thermo Fisher Scientific®, Waltham, MA, USA). Concentrations ranged  
136 from 26 to 75 ng/ul, with an average 43 ng/ul. A260/A280 ratios ranged from 1.882 to 1.984,  
137 with an average ratio of 1.931. A260/A230 ranged from 1.84 to 2.681, with an average ratio of  
138 2.206. Samples were then shipped to Thermo Fisher ® for additional quality control and  
139 genotyping. DNA concentration and quality for all samples was confirmed using a ‘PicoGreen’  
140 assay. Average DNA concentration was about 47 ng/μL for 926 high-quality samples. The  
141 remaining 219 samples had a concentration of 15 ng/ul and were considered of sufficient quality  
142 and quantity for genotyping. Samples were then genotyped using the 48k Thermo Fisher ®  
143 ‘Axiom\_arachis2’ SNP array. Of the 1,145 samples, 25 replicate samples were not successfully  
144 genotyped.

145 Raw SNP intensities from Affymetrix were analyzed using the ‘Best Practice Workflow’  
146 available in the Axiom Analysis Suite. A total of 47,837 SNPs was obtained, of which 14,430  
147 were categorized as ‘Poly High Resolution’, 15,528 were ‘Mono High Resolution’, 11,008 were  
148 ‘No Minor Homozygote’, and the remaining 6,871 were of low-quality. Poly High Resolution  
149 SNPs were processed into a standard VCF format (Supplementary Files S2 and S3) using custom  
150 bash scripts for downstream analyses  
151 ([https://github.com/cannongroup/peanut\\_core\\_collection\\_genotyping](https://github.com/cannongroup/peanut_core_collection_genotyping)).

152

### 153 **Diversity, phylogenetic, and network analysis**

154 Several aspects of diversity analysis were carried out on variant data in FASTA format - i.e. with  
155 SNP variants represented as DNA bases, positioned in the genomic order of the loci. A FASTA-  
156 format sequence representation of the ‘Axiom\_Arachis2’ SNP array variant data was generated  
157 by converting genotype calls in the array to DNA base calls from the Axiom\_Arachis2 VCF file  
158 generated by ThermoFisher, using custom shell scripts that converted AA/BB calls to A, T, C, G,  
159 or "-" (scripts are available at  
160 [https://github.com/cannongroup/peanut\\_core\\_collection\\_genotyping](https://github.com/cannongroup/peanut_core_collection_genotyping)). The matrix contains  
161 14,430 high-confidence SNPs, for 1,120 samples. Relative positions of the SNPs were also  
162 determined from the consensus genomic locations from five *Arachis* genome assemblies, as  
163 described below. This sequence representation is available as Supplementary Files S4 and S5.

164 Base-calls were also derived computationally for four sequenced *Arachis* genomes: *A.*  
165 *duranensis*, *A. ipaënsis* (Bertioli et al. 2016) and *A. hypogaea* varieties Tifrunner (Bertioli et al.  
166 2019), Shitouqi (Zhuang et al. 2019), and Fuhuasheng (Chen et al. 2019). Base-calls from the  
167 genomic sequences were made by aligning flanking sequences plus the variant base, using two



168 sequences per variant per locus, to the respective genome, using blastn (Altschul et al. 1990).  
169 Per-locus SNPs were called when the flanking+variant sequence matched at 100%, over at least  
170 65 of 71 bases, to only one location in the genome (i.e. full-length alignments were not required,  
171 but perfect match was required within the alignment).

172 The genome-derived SNPs were added to a version of the sequence variant-call file  
173 (Supplementary Files S4 and S5) with the *A. duranensis* and *A. ipaënsis* calls combined into one  
174 “synthetic-tetraploid” accession. Base calls that were absent in that accession were removed  
175 from the merged file, giving an alignment 10,278 bases wide, by 1,123 samples (after removal of  
176 PI493562\_1, which appears to have had a label tracking error). Approximate genomic locations  
177 of SNPs were determined as: the location in the respective diploid chromosomes were present;  
178 otherwise, the location in Tifrunner; otherwise in Shitouqi; otherwise the location in Fuhuasheng,  
179 as shown in Supplementary File S6. Two reduced alignments were also generated  
180 (Supplementary Files S7 and S8), consisting of representative “centroid” sequences from clusters  
181 at the 98% and 99% identity levels, using the cluster\_fast method in the vsearch suite, version  
182 2.4.3 (Rognes et al. 2016).

183 The phylogenetic tree in Figure 1 and Supplementary File S9 was calculated using FastTreeMP,  
184 version 2.1.8 (Price et al. 2010), with default parameters. The network diagram in Figure 2 was  
185 calculated on the 99%-identity centroid alignment, using the Neighbor-Net algorithm in the  
186 SplitsTree package, version 4.15.1 (Huson and Bryant 2006).

## 187 **Replicate analysis**

188 To assess the genetic similarity among multiple samples from an accession, a list of all possible  
189 pairs of replicates per accession was calculated, giving “N choose 2” combinations for an

190 accession with N samples: 3 combinations for an accession with 3 samples; 6 combinations for  
191 an accession with 4 samples, etc. For each possible combination, the sequence identity was  
192 calculated between the sequence pairs (using blastn), and then scored as “similar” if  $\geq 98\%$   
193 identity and “dissimilar” otherwise. These results are shown in the “rep analysis” worksheet of  
194 Supplementary File S1.

## 195 Structure and Principal Component Analysis (PCA)

196 To define subpopulations based on genomic sequences, a structure analysis and PCA was  
197 performed on high confidence Axiom\_Arachis2 SNP array variant data. Structure analysis was  
198 performed using a Bayesian inference algorithm implemented in fastStructure (Raj et al. 2014).

199 The fastSTRUCTURE resulted in five clusters (K=5) which are shown in Figure 3 and  
200 Supplementary Files SF10 and SF11. All 13,410 SNP sequences were used for a representative  
201 set of 518 “unique” accessions, selected based on sequence identity at 98%. Clusters and group  
202 membership were determined for arbitrary groups ranging from K 1 to 10 with settings: *--prior =*  
203 *logistic, --cv = 0, --tol = 10e-6*, default otherwise. Structure was visualized as proportionally  
204 colored bar plots representing global ancestry estimates (Q values) using an R package,  
205 Pophelper version 2.3 (Francis 2017).

206 To avoid the strong influence of SNP clusters in principal component analysis (PCA) and  
207 relatedness analysis, only SNPs in approximate linkage equilibrium with each other ( $r^2 = 0.2$ )  
208 were used. The R package, SNPRelate (Zheng et al. 2012), was used for LD pruning on 1120  
209 samples. *snpGdsLDpruning* in the SNPRelate package, was used to recursively remove biallelic  
210 SNPs in LD within a sliding window of 1Mb. LD threshold was specified at  $r^2 = 0.2$ .

211 Monomorphic SNPs were also removed along with uncommon SNPs filtered at  $MAF < 5\%$   
212 leaving a final set of 2,063 markers in approximate linkage equilibrium with each other.  
213 PCA was performed using `snpGdsPCA` from the `SNPRelate` package at default settings and  
214 plotted using `ggplot2` for defined groups. PCA results are shown in Figure 4 and Supplementary  
215 File S12. Groups were defined according to: whether or not they flowered on the main stem,  
216 their botanical variety defined in GRIN-Global, agronomic type (market group), growth form,  
217 pod type, and country from which seed was originally collected.

## 218 **Population differentiation analysis**

219 To evaluate differentiation between and among accession groups, we calculated  $F_{ST}$  for selected  
220 accession groups defined as above under the Structure and PCA methods section. Results are  
221 shown in Figure 5A-F. SNPs were first pruned to reduce SNPs in strong LD with one another, as  
222 described above. The  $F_{ST}$  analysis was performed using the R package `Hierfstat`, (Goudet 2005)  
223 at default settings. Pairwise  $F_{STs}$  were calculated using `pairwise.WCfst` according to (Weir and  
224 Cockerham 1984). A heatmap of pairwise  $F_{STs}$  was plotted using `ggcorrplot` (Kassambara 2016),  
225 for defined groups.

## 226 **Geographical distribution**

227 A plot of the geographical distribution of peanut accessions by clade (Figure 6) was generated  
228 using the germplasm Geographical Information System (GIS) utility at PeanutBase.org (Dash et  
229 al. 2016), with the “add your data” tool. To display the five germplasm categories identified in  
230 Figures 1 and 2, we used the following column labels, which are interpreted by the GIS tool:  
231 `accession_id`, `trait_observation_value`, `trait_descriptor`, `taxon`, `trait_is_nominal`.

## 232 **Analysis of subgenome invasions**

233 To track possible instances of subgenome interactions, 16 accessions were selected from across  
234 the clades identified in Figures 1 and 2 and alleles were examined relative to those identified in  
235 the diploid accessions (Supplementary Files SF6 and SF13). Alleles for each accession were then  
236 marked as being the same as the A-genome allele and not the B-genome allele (A-like), or same  
237 as the B-genome allele and not the A-genome allele (B-like), or other conditions (invariant in the  
238 diploids, different from both diploids, or missing in one or more of the tetraploid or diploid  
239 accessions). The results are shown in Figure 7, with red indicating identity with the respective  
240 subgenome (A-like for chromosomes 1-10, and B-like for chromosomes 11-20).

## 241 **Data Availability**

242 All data is available at the National Ag Library: <https://doi.org/10.15482/USDA.ADC/1518508>  
243 and at PeanutBase: [https://peanutbase.org/data/public/Arachis\\_hypogaea/mixed.esm.KNWV](https://peanutbase.org/data/public/Arachis_hypogaea/mixed.esm.KNWV).

244 **File S1** (tables) [SF01\_peanut\_core\_v14.xlsx] contains the main descriptive information about  
245 the genotyped accessions, including: information about replicate similarity; phylogenetic clades,  
246 geographic origin, and phenotype; and summaries of phenotypic and country information relative  
247 to clade assignments.

248 **File S2** (text file) [SF02\_SNPs\_whole\_Axiom\_Arachis2.txt] has the original genotype calls for  
249 the Axiom array (for poly-high resolution SNPs).

250 File S3 (text file) [SF03\_SNPs\_whole\_Axiom\_Arachis3.vcf] has the Axiom array genotype  
251 calls, in VCF format.

252 **File S4** (text file) [SF04\_SNPs\_w\_4\_genomes.tsv] has the predominant DNA variants at each  
253 SNP location, for all accessions, including variants inferred from four available genome  
254 assemblies: *A. duranensis* and *A. ipaensis* together, and *A. hypogaea* accessions Tifrunner,

255 Shitouqi, and Fuhuasheng. The format is in a simple tab-separated table, with 14431 columns  
256 (SNP positions).

257 **File S5** (text file) [SF05\_SNPs\_w\_4\_gnm\_mrgd.fas] the same SNP as in S4 above, but in fasta  
258 format. SNP locations without DNA assignments for *A. duranensis* and *A. ipaensis* have been  
259 removed, giving an alignment of 10278 bases.

260 **File S6** (tables) [SF06\_chip\_and\_genome\_samples\_v04.xlsx] has DNA base-calls for 16  
261 selected, diverse accessions, with comparisons to the variants observed in the *A. duranensis* and  
262 *A. ipaensis* genomes, and inferences regarding the likely progenitor for the DNA, i.e. A-genome  
263 (*A. duranensis*) or B-genome (*A. ipaensis*).

264 **Files S7 and S8** (text files) [SF07\_SNPs\_w\_4\_gnm\_mrgd\_cen98.fas and  
265 SF08\_SNPs\_w\_4\_gnm\_mrgd\_cen99.fas] are reduced fasta alignments (relative to the complete  
266 alignment file, S5). File S7 has the centroid representatives at 98% identity, and S8 has centroid  
267 representatives at 99% identity. These files have 518 and 680 sequences, respectively.

268 **File S9** (text file) [SF09\_SNPs\_w\_4\_gnm\_mrgd\_rt3.nh.txt] is the phylogenetic tree (Newick  
269 format) calculated from the alignment in S5, and corresponding with the phylogenetic tree shown  
270 in Figure 1.

271 **File S10** (figure) [SF10\_K5\_membership.pdf] shows the proportion of accessions assigned to  
272 clusters 1-5 in a Structure analysis (Figure 3), for K=5 clusters.

273 **File S11** (tables) [SF11\_K5\_cluster\_assignment.xlsx] gives the proportional assignments of each  
274 cluster to all accessions (relative to the Structure diagram shown in Figure 3).

275 **File S12** (figure) [SF12\_pca\_34.pdf] Principal Component Analysis of 1120 samples based on  
276 2063 unlinked SNP markers. The X-axis represents PC 3 and the Y-axis represents PC 4.  
277 Samples are colored and grouped according to: A. clade membership as defined in the

278 phylogenetic and network analyses, B. botanical varieties, C. market type, D. growth habit, E.

279 pod shape, and F. collection (core, mini core, cultivar).

280 **File S13** (tables) [SF13\_chip\_and\_genome\_GFFs.xlsx] Inferred subgenome origins of SNPs

281 relative to the A-genome and B-genome progenitors (*A. duranensis* and *A. ipaensis*). This data is

282 in GFF format, derived from S6, and used as the basis for the plots in Figure 7 (showing regions

283 of possible subgenome invasions).

284 **File S14** (figure) [SF14\_Pi497426\_pods.jpg] Pods from accession PI 497426 (clade 4),

285 illustrating the distinctive reticulation pattern seen in some accessions in this clade.

286 **File S15** (figure) [SF15\_Sipan\_necklace\_Donnan\_Einstein.jpg] Picture of necklace of peanuts,

287 sculpted in gold and silver, from the Moche-era tomb at Sipán (ca. AD 250) in coastal Peru.

288 Photograph by Susan Einstein, courtesy of Christopher Donnan.

## 289 **Results and Discussion**

### 290 **Replicate analysis**

291 For the 253 accessions with replicates, a maximum of 428 pairings from same-accession

292 groupings were expected. For example, an accession with one replicate (A and B) has one

293 expected pairing (A-B), while an accession with two replicates (A,B,C) has three expected

294 pairings (A-B, A-C, B-C), and an accession with three replicates has six expected pairings. A

295 missed pairing means that one or more samples for an accession are genetic outliers, and that the

296 accession is not homogeneous. Accessions chosen for replicate genotyping included 35

297 accessions noted in GRIN-Global as being potentially mixed or in which the seeds appeared to

298 be visibly heterogeneous. Additionally, replicate genotyping was carried out for 218 accessions

299 selected at random from the core.

300 Of the 428 expected pairings among replicates (with >70% sequence identity across all SNP  
301 locations), 368 pairings were observed (86%). The observed pairings had an average identity of  
302 94.4% and a median of 98.7%. The 60 instances of a sample that did not match to a replicate for  
303 that accession occurred among 42 accessions, meaning that some accessions had more than one  
304 “missing” match for a replicate.

305 Of the 35 accessions selected as “probably mixed” based on seed color or other notes in GRIN  
306 records, most (77%) were indeed mixed genotypically only eight of these accessions had all of  
307 the replicates close to identical ( $\geq 98\%$ ) across all replicates. For the others (27/35), at least one  
308 sample per accession was not like the others at the 98% identity threshold.

309 Of the 236 accessions selected at random for replicate genotyping, most (56%) accessions were  
310 NOT mixed genotypically: in 123 of these accessions, all replicates were close to identical  
311 ( $\geq 98\%$ ) across all replicates. Nevertheless, the high rate of apparent genotypic heterogeneity in  
312 accessions suggests that the core collection will require further subdivisions or selections to  
313 generate material that is well suited for analyses such as QTL and GWAS.

### 314 **Diversity analysis: phylogenetic analysis**

315 The core collection contains considerable phenotypic diversity, but also displays high genotypic  
316 similarity among many accessions, as apparent in Figure 1, where many accessions are near-  
317 identical in the phylogeny. The 1,122 samples (791 accessions) in this study fall into 671 clusters  
318 at an identity threshold of 99% (Supplementary File S1, worksheet “clusters”). The largest  
319 clusters at 99% identity have 139, 49, 27, and 25 samples (112, 42, 21, and 22 distinct  
320 accessions), and the cluster sizes fall progressively to the singletons, of which there are 560. The  
321 existence of large clusters of nearly identical accessions suggests that diversity in the core could

322 be represented by a smaller number of accessions (671, specifically, if 99% identity were used as  
323 the identity cutoff).

324 The phylogenetic tree of accession diversity shows four primary clades of accessions, numbered  
325 1-4 in Figure 1, with an intermediate group (3.2) also indicated. These clade numbers are also  
326 used in the network diagram Figure 2. Although some accessions occur on early branches in  
327 these clades (rather than nested tightly in terminal clusters), the clades are nevertheless mostly  
328 distinct in both the phylogeny and the network plot. The clade designations also generally  
329 correspond with the Structure plot at cluster-number K=5 Figure 3. The Structure plot is ordered  
330 by the tree order from Figure 1.

331 A top-level summary of the cluster- and trait-correspondences demonstrates that most  
332 accessions, including all named cultivars, fall into three large clades (1, 2, and 3), but those  
333 clades don't correspond cleanly with typical peanut classifications (e.g. growth habit, botanical  
334 variety, market type, or pod type). Traits categories are shown superimposed on the clades, in the  
335 PCA plots in Figure 4. A smaller clade (4) does correspond with these typical classification traits  
336 (Figures 1 and 4). Clade 4 has exclusively erect growth habit, with pod-types of hypogaea,  
337 valencia, or mixed pods, but frequently having strong, linear reticulation, and including the  
338 *aequatoriana* botanical variety of subspecies *fastigiata*, as exemplified by PI 497426 from this  
339 clade (Supplementary File S14).

340 For each cluster, counts and proportions of phenotypic characters and collection region are given  
341 in Table 1. The clusters have some correspondence with growth-habit traits and with countries of  
342 seed origin, as described below. (In this section, all counts are given per accession rather than per  
343 sample, as some accessions were genotyped multiple times).



344 Clade 4 (Figures 1 and 4; at the bottom in Figure 1; 104 samples, 84 accessions) is the most  
345 distinctive and consistent phenotypically: most accessions (68.4%) have upright growth habit,  
346 per Holbrook's phenotype evaluations (Holbrook and Dong 2005). The pod type is more varied,  
347 with accessions scored as *hypogaea*, *fastigiata*, or mixed (36.8, 31.6%, 31.6%)(Holbrook and  
348 Dong 2005). Growth type was scored as *fastigiata* for seven accessions and two as *aequatoriana*.  
349 The *aequatoriana* type is a botanical variety of the subspecies *fastigiata* (Krapovickas et al.  
350 2007). pod images from GRIN-Global for this clade show pods frequently having strong  
351 reticulation and widely-spaced veins running the length of the pod (Supplementary Figure S14) -  
352 which is of interest as these characteristics are seen in pre-colonial archaeological finds in Peru,  
353 Chile, and Argentina (Supplementary Figure S15). Most of the cluster 4 accessions originate  
354 from west-central South America (Figure 6), primarily from Bolivia, Peru, Ecuador, and  
355 Argentina (38, 17, and 9, and 8 accessions, respectively). Interestingly, the inferred genotype for  
356 *A. duranensis* and *A. ipaensis* (consisting of alleles at loci corresponding with the marker  
357 flanking sequences from the SNP array) also falls solidly within cluster 4, with 100% bootstrap  
358 support on several subtending branches in this clade.

359 Clade 3.2 (Figures 1 and 4; second from bottom in Figure 1; 88 samples, 71 accessions) shows  
360 general phenotypic consistency: most accessions have the *fastigiata* botanical variety, upright  
361 growth habit, and *fastigiata* pod type (94.4%, 77.8%, and 66.7%, respectively). This is a  
362 transitional clade, with similarities to both Clades 2 and 3.

363 Clade 3 (Figures 1 and 4; third from bottom in Figure 1; 275 samples, 215 accessions) shows  
364 general phenotypic consistency: most accessions have the *fastigiata* botanical variety, upright  
365 growth habit, and *fastigiata* pod type (92.6%, 66.7%, 89.5%, respectively). Both characteristics  
366 distinguish this group from Cluster 4. The most frequent South American accession origins for

367 Cluster 3 are Bolivia, Argentina, and Brazil (40, 5, 5, respectively), with one each from Peru and  
368 Ecuador. The most frequent non-South American countries for cluster 3 are Zambia, Nigeria, and  
369 Zimbabwe (12, 6, and 6, respectively).

370 Clade 2 (Figures 1 and 4; second from top in Figure 1; 291 samples, 216 accessions). In this  
371 clade, most accessions have the *fastigiata* botanical variety, *fastigiata* growth habit, and  
372 *fastigiata* pod type (83.3%, 87.1%, 83.3%, respectively). The Clade 2 accessions also have the  
373 widest geographic spread. also cosmopolitan in terms of country of origin. The most frequent  
374 South American countries for these accessions are Brazil, Argentina, Cuba, and Uruguay (10, 9,  
375 6, 5, 5, respectively). Non-South American countries are the predominant sources for these  
376 accessions, however; Zambia, Zimbabwe, India, and Sudan are the most frequent sources (34,  
377 17, 13, 13, 13, respectively). Because the highest-frequency countries of origin are Brazil in  
378 South America and Zambia, Zimbabwe and Sudan in Africa suggests early movement of this  
379 germplasm through the slave and other colonial trade.

380 Clade 1 (Figures 1 and 4; top in Figure 1; 364 samples, 279 accessions). In this clade, most  
381 accessions are classified as the *hypogaea* botanical variety and “mixed” or *hypogaea* pod shape  
382 (60.0%, 44.4%, 40.0%). Growth type varies widely, divided fairly evenly between erect, bunch,  
383 spreading-bunch, mixed, and prostrate). The most frequent market type is Virginia (64.2%). As  
384 with Cluster 2, the geographical spread is highly cosmopolitan (Figure 6), with the largest  
385 numbers coming from Zambia, Israel, India, Nigeria, and China (40, 37, 29, 27, 26,  
386 respectively).

387 **The geographic distribution of genotypes**

388 All parts of the phylogenetic tree are dominated by accessions from South America, but all  
389 clades also have interspersed accessions from many parts of the world Table 2. This pattern of  
390 broad geographical dispersal, with heavy representation in South America, confirms that peanut  
391 had fully diversified into modern cultivar types prior to dispersal through colonial shipping and  
392 trade. Influence of the slave and spice trade is suggested by adjacent appearance in the  
393 phylogenetic tree of widespread geographical locations. for example, accessions from Portugal  
394 are interspersed among accessions from countries in west Africa, south Asia, and the Caribbean  
395 and eastern South America (in Clades 1, 2, 3, and 3.2) or Spain and countries in Africa, the  
396 Middle East, and Asia (middle of Clade 1).

397 Clade 4 is much less mixed geographically, coming predominantly from central and western  
398 South America (Figure 6). Peanut's geographic origin (through the initial instance of tetraploidy)  
399 has been convincingly established as having occurred in (Bertioli et al. 2016; Bertioli et al.  
400 2019)southeastern Bolivia/northwestern Argentina (Bertioli et al. 2016; Bertioli et al. 2019). It is  
401 therefore noteworthy that the combined diploid progenitors (*A. duranensis* and *A. ipaensis*) fall  
402 into the Bolivia-dominated Clade 4. This clade contains *hypogaea* and *fastigiata* varieties,  
403 including the uncommon *aequatoriana* variety , which is classified (Krapovickas et al. 2007) as  
404 *A. hypogaea* subsp. *fastigiata* var. *aequatoriana*. The *aequatoriana* variety is generally not  
405 widely used in cultivation outside of the landrace occurrence in these regions in South America.

406 Krapovickas (1995) describes *A. hypogaea* subsp. *hypogaea* var. *hirsute*, *A. hypogaea* subsp.  
407 *fastigiata* var. *peruviana*, and *A. hypogaea* subsp. *fastigiata* var. *aequatoriana* as being important  
408 in ancient times, and still important locally, being found in Peruvian markets, for example. These  
409 highly reticulated pod types are also seen in multiple archaeological sites on the coast of Peru  
410 and Chile, and Argentina (Masur et al. 2018; Krapovickas 1995), as well as in early European

411 herbarium specimens. This pod form is depicted in the royal tombs of Sipán, in northern Peru,  
412 dating ca. 250 AD, associated with the Moche culture (Krapovickas 1995; Masur et al. 2018).  
413 The peanut form in the necklace, sculpted clearly in gold and silver, is identified by Krapovickas  
414 (1995) as *A. hypogaea, subsp. fastigiata var. peruviana*. (Supplementary Figure S15).

415 The identification of southeastern Bolivia, as the center of origin of cultivated peanut relies on  
416 several lines of evidence. Both ancestral diploid species *A. duranensis* and *A. ipaensis* are found  
417 close to Villa Montes, in the Province of Tarija (Krapovickas et al. 2009; Krapovickas and  
418 Gregory 1994). These species are strongly prostrate, lack flowers on the main stem, have dark  
419 green leaves, and small two seeded pods (Krapovickas et al. 2009; Krapovickas and Gregory  
420 1994). Also in Tarija are found a large number of var. *hypogaea* landraces including the  
421 archetypal primitive cultivated peanut, “Rastrero colorado de dos granos,” which combines the  
422 most primitive characteristics being, a strongly prostrate variety, with dark green leaves, lacking  
423 flowers on the main stem, and most importantly, it has two seeded pods with small seeds  
424 (Krapovickas et al. 2009; Krapovickas and Gregory 1994). This combination of prostrate habit  
425 and small seeds is very rare. The sample studied here did not include Rastrero colorado de dos  
426 granos, but it is notable that Clade 4 includes other landraces with these Tarija primitive  
427 characteristics. These include Sara Maní (PI 468280), from nearby Cochabamba Province, which  
428 has pods that are very similar to Rastrero colorado de dos granos, except with a slightly less  
429 prominent beak (Krapovickas et al. 2009). Also very notably, Clade 4 contains all nine of the  
430 smallest seeded var. *hypogaea* types (prostrate and lacking flowers on the main stem): PI  
431 336978, PI 442768, PI 210831, PI 497342, PI 331337, PI 471986, PI 288210, PI 221068, and PI  
432 468280.

### 433 **Network and Structure analysis**

434 To further define subpopulations and the genetic relatedness among accessions, we performed a  
435 structure and network analysis (Figure 3). At  $K = 5$ , accessions were assigned into groups that  
436 corresponded with phylogenetic and network assignments in Figures 1 and 2.

437 Clusters 1 and 2 had the most membership and cluster 3 the least (166, 164, 19) (Supplementary  
438 Files S10 and S11). Based on the global ancestry estimates on all genomic SNP sequences (Raj  
439 et al. 2014), accessions were colored in accordance with cluster assignment. An accession that  
440 could not be assigned to a definitive cluster was painted admixed with colors representative of  
441 each cluster with which it proportionally shared genomic sequences.

442 Overall, 240 accessions were exclusively assigned to a single group and 278 were assigned, in  
443 admixed proportions, to two or three groups: with 221 assigned to two, and 57 to three clusters.  
444 Of the 12 check cultivars genotyped, eight were assigned to cluster 4, along with Tifrunner. Of  
445 these, only Jupiter was exclusively assigned to a single cluster with the remaining seven,  
446 including Tifrunner, sharing admixed proportions with more than one cluster. Fuhuasheng and  
447 Shitouqi were assigned to cluster 2, same as cultivars Olin and Tamnut OL 06. The synthetic  
448 tetraploid sequence “*duranensis\_ipaensis*” was assigned to cluster 5 - the only cluster without  
449 any cultivar assigned.

450 Clustering accessions via a phylogenetic analysis is overly simplistic as it suggests a one-  
451 dimensional source for sequence similarity or dissimilarity between a pair of accessions.

452 Network analysis provides a more representative and explanatory relationship between given  
453 accessions. In Figure 2, accessions with similar sequence characteristics cluster near each other  
454 in the network. The further apart accessions are in the network, the more different they are in  
455 sequence characteristics (Figure 2). Four main clusters were defined representing accessions that

456 were more similar to each other and distinct from those in other clusters. Even though most  
457 accessions cluster in close correspondence to phylogenetic cluster definitions, exceptions show  
458 that a bifurcating tree representation of sequence similarity may not represent the true underlying  
459 nature of relatedness among accessions.

460 Overall, we found groups defined on phylogenetic clade membership to correspond with groups  
461 defined by structure and network analyses. These groups showed high genetic differentiation.  
462 Clade 1 was genetically distinct from Clades 2, 3, 3.2 and 4 ( $F_{ST}$ s : 0.74, 0.75, 0.67, 0.51). Clades  
463 3 and 3.2 were not much different from each other ( $F_{ST}$  0.22). Clade 3.2 was also not strongly  
464 distinct from Clade 2 ( $F_{ST}$  0.3). Genetic clustering via PCA confirmed the main groups as distinct  
465 clusters (Figure 4A, Figure 5A).

#### 466 Genetic diversity correlates with subspecies and botanical types

467 Principal Coordinates 1 and 2 (PC1 and PC2), which together explained 59.75 % of the genetic  
468 variation in the collection, differentiated between the two subspecies and corresponding  
469 botanical varieties. PC1 separated *ssp. hypogaea* from *ssp. fastigiata*, while PC2 delineated  
470 between the two *ssp. fastigiata* varieties; separating *var. fastigiata* from *var. vulgaris*. PC1 also  
471 corresponded with Virginia and Runner type accessions while PC2 separated Spanish types from  
472 Valencia types (Figures 4B,C).

473  
474 These results suggest a pattern, consistent with the biology of subspecies and botanical variety  
475 classification, as the most important correlates of the genetic diversity in the collection. Previous  
476 studies using a subset of this collection, the mini core, have suggested the presence of between  
477 four to five sub-populations (Otyama et al. 2019; Wang et al. 2011; Belamkar et al. 2011). These

478 results recapitulate and add support to these findings, further linking biology to the landscape of  
479 genetic stratification in the U.S. peanut core collection.

480 Growth form and pod shape did not correspond well with PCA even though both traits are key  
481 determinants of agronomic type classification, and, by extension, subspecies groups (Figures  
482 4D,E). Pod shape considers the constriction, reticulation, and the number of seeds per pod to  
483 define five main groups: *vulgaris*, *fastigiata*, *peruviana*, *hypogaea* and *hirsuta*. Spanish and  
484 Valencia types are classified as “bunch” for their upright growth form while Virginia and Runner  
485 types are classified as “runners” for their prostrate (flat) growth form. Several Virginia varieties  
486 are also classified as “decumbent”, for their intermediate growth form between “runner” and  
487 “bunch” (Pittman 1995). The lack of a clear correspondence between growth form and pod shape  
488 with genetic diversity, begs for more studies with special emphasis on accurate phenotyping, to  
489 help establish their contribution to genetic stratification and diversity in peanut collections.

#### 490 Genetic differentiation among groups ( $F_{ST}$ fixation index)

491 The genetic difference between varieties belonging to contrasting subspecies was relatively high.  
492 Accessions classified as var. *vulgaris* appeared genetically distinct from those classified as var.  
493 *hypogaea* with  $F_{ST}$  0.59. The difference was comparatively low for varieties of the same  
494 subspecies, var. *vulgaris* and var. *fastigiata* accessions,  $F_{ST}$  0.198 (Figure 5B). This provides  
495 clear evidence for the genetic distinction between subspecies and corresponding botanical  
496 varieties.

497 Interestingly, a comparison between var. *aequatoriana* and var. *fastigiata* showed a surprisingly  
498 high level of differentiation,  $F_{ST}$  0.40. Since both varieties are classified as ssp. *fastigiata*,  
499 genetic differentiation was expected to be much smaller. Contrastingly, we observed low genetic

500 separation for an inter-subspecies comparison between var. *aequatoriana* and var. *hypogaea*,  $F_{ST}$   
501 0.2 (Figure 5B). This result suggests a possible misclassification of var. *aequatoriana* accessions,  
502 which share greater similarity to ssp. *hypogaea* than the ssp. *fastigiata* group to which they are  
503 assigned. Evidence for misclassification was first suggested by (He and Prakash 2001; Raina et  
504 al. 2001; Ferguson et al. 2004; Tallury et al. 2005; Freitas et al. 2007; Cuc et al. 2008) and later  
505 alluded to by (Bertioli et al. 2011). However, like their studies, this present analysis suffers from  
506 a low number of var. *aequatoriana* accessions. Additionally, only 159 samples representing  
507 accessions in the core, have been classified. Of these, 114 are classified as var. *fastigiata*, 43 as  
508 var. *hypogaea* and two as var. *aequatoriana* (Data source: GRIN). Since within-population  
509 diversity has been shown to affect  $F_{ST}$  as an estimate of genetic differentiation among  
510 populations (Hedrick 1999; Bird et al. 2011), we recommend cautious interpretation of these  
511 results, especially where they conflict with known peanut biology.

512 Market types, Spanish and Virginia, showed evidence of genetic differentiation ( $F_{ST}$  0.4), as did  
513 Valencia and Virginia ( $F_{ST}$  0.4), and Valencia and Spanish ( $F_{ST}$  0.3) (Figure 5C). Indeed,  
514 accessions marked as “mixed” showed low pairwise genetic differentiation with main groups –  
515 as would be expected from a phenotypically ambiguous group. As expected, Runner accessions  
516 were more similar to Virginia accessions ( $F_{ST}$  0.027) compared to Valencia ( $F_{ST}$  0.29), and  
517 Spanish types ( $F_{ST}$  0.26) (Figure 5C). Classification studies place Valencia and Spanish types  
518 under the same subspecies, ssp. *fastigiata*, but different botanical varieties - var. *fastigiata* and  
519 var. *vulgaris*, respectively. Virginia types are classified under a different subspecies altogether -  
520 ssp. *hypogaea* var. *hypogaea*. This result supports Runner types as a hybrid between the two  
521 peanut subspecies as classified by Krapovickas (1969).



522 Non-distinct phenotypes like pairwise comparisons of growth forms: “spreading-bunch”,  
523 “spreading”, “bunch” and “mixed”, which are affected by environmental conditions, resulted in  
524 less pronounced genetic separation among groups. The contrast was true with phenotypically  
525 distinct groups for pairwise comparisons between growth forms: “spreading” and “prostrate”  
526 ( $F_{ST}$  0.55), “spreading” and “erect” ( $F_{ST}$  0.39), “spreading-bunch” and “erect” ( $F_{ST}$  0.28) (Figure  
527 5D). This suggests a good prediction of phenotypic diversity by genetic variation. Groups  
528 defined under pod shape were not distinct from each other suggesting phenotypic ambiguity in  
529 these classes (Figure 5E).

530 Collectively, these results suggest a level of stratification that is consistent with subspecies  
531 groups and botanical variety classification. Overall, we found accessions were similar within  
532 botanical varieties and subspecies groups, but genetic separation increased evidently between  
533 group comparisons. This carries important implications for studies using this collection for  
534 genetic associations. Treating the collection as a homogenous group may obscure association  
535 results and if not properly accounted for, population stratification may cause studies to fail due to  
536 lack of significant results or overwhelming false-positive signals.

### 537 **Geographic origin does not generally correspond with genetic diversity**

538 On the whole, the country of seed origin was not an important contributor to structure in the  
539 collection. There was little genetic differentiation between peanuts based on where seed was  
540 originally collected. African and North American accessions appeared genetically similar ( $F_{ST}$   
541 0.02), as did Asian and African accessions ( $F_{ST}$  0.01) (Figure 5F).

542 We also found the country of seed origin to be a poor correlate of genetic structure, even though  
543 the core collection is predominated by accessions from South America and Africa, which

544 together make up 74.6% of the entire collection. The peanuts collected from Bolivia and South  
545 America were not so distinct as to cluster around a recognizable pattern or separate from those  
546 collected from other continents. This may suggest that not many independent mutations have  
547 arisen in the different continental subgroups to cause significant genetic separation. It is also  
548 known that peanuts had completely differentiated into subspecies and botanical varieties prior to  
549 being dispersed from their center of origin by early explorers and traders (Simpson et al. 2001).

### 550 **The mini core is representative of the genetic diversity in the core collection**

551 The mini core collection was created to further define a small manageable sub collection  
552 representative of the diversity in the germplasm collection. The need was driven by a reliance on  
553 low-throughput markers, like RFLPs and SSRs, which are difficult and costly to assay in large  
554 collections and some agronomic traits being quite difficult and costly to measure (Holbrook and  
555 Dong 2005). We used genetic clustering via PCA to define how well the mini core represents the  
556 diversity in the core collection.

557 Results show remarkable representation spanning the entire spread of the genetic diversity in the  
558 core collection (Figure 4F). Thus, clustering on select morphological characteristics followed by  
559 sampling within defined clusters likely resulted in the selection of a well representative set. The  
560 main weakness of the mini core is its relatively small size (94 available accessions), which  
561 weakens the ability to identify novel marker-trait associations in genome-wide association  
562 studies (Otyama et al. 2019). However, the mini core collection has proven to be of much utility  
563 for identifying germplasm with desirable characteristics for breeding pipelines and for verifying  
564 identified marker-trait associations (Holbrook and Dong 2005; Dean et al. 2009; Wang et al.  
565 2011).

## 566 **Subgenome exchanges are a significant source of diversity in tetraploid**

### 567 **peanut**

568 An enduring puzzle regarding peanut evolution is that the diversity in the crop appears to have  
569 arisen quickly, from a severe genetic bottleneck at the time of the tetraploidization event roughly  
570 10,000 years ago, likely involving a rare, single plant in an early horticulturalist's garden  
571 (Bertioli et al. 2019). The diploid progenitors, *A. duranensis* and *A. ipaensis*, separated  
572 approximately 2 million years ago (Bertioli et al. 2016), and the best evidence is that the mergers  
573 of these diploids has occurred only once in pre-modern times (Bertioli et al. 2016; Bertioli et al.  
574 2019). To put the question simply: how did so much genotypic and phenotypic diversity arise in  
575 modern peanut varieties?

576 One source of the diversity was identified by (Bertioli et al. 2019), with the reporting of the high-  
577 quality Tifrunner genome sequence. Specifically, exchanges between corresponding  
578 chromosomes of the A and B genomes were seen - on scales both small (on the gene-scale), and  
579 large (on the scale of multiple megabases, at chromosome ends). We used the genotyping data  
580 from the current project to independently assess the patterns of subgenome exchanges.

581 In the variation data from the Affymetrix array, we found evidence of both widespread small-  
582 scale exchanges between subgenomes, and apparent large-scale "invasions" of one subgenome to  
583 the other. These patterns are evident in Figure 7, shown in red, whereas gray indicates loci where  
584 subgenome exchange either was not observed or there was insufficient evidence regarding  
585 exchange. One pattern to note is that different accessions show different patterns. Each of the 16  
586 diverse accessions used for comparison is represented along a vertical slice next to each  
587 chromosome. At high resolution, many between-accession differences can be seen - for example,

588 at the top of A01, where the first two accessions show an exchange, and the middle accessions  
589 do not. Also noteworthy are regions that were reported, in the Tifrunner genome paper, to show  
590 invasion (and replacement) of one subgenome by the other. In these locations (marked in green  
591 along the chromosome backbones), most alleles are either all red, indicating that the  
592 chromosomal segment was contributed by the other subgenome; or all gray, indicating that the  
593 chromosomal segment was contributed by the “cis” subgenome. This is evident at the top of A05  
594 and B05, for example.

595 Of the 10,829 SNP positions for which it was possible to evaluate subgenome exchanges (as data  
596 was present for all tested lines), there was evidence of exchanges in at least one accession for  
597 1,068 positions (9.8%). This is likely a highly conservative estimate, as many positions are  
598 ambiguous with respect to subgenome origin - for example, when the reference SNPs from the  
599 diploids may be from the other allele (not represented in the genome sequence).

600 Our interpretation is that a substantial fraction (>10%) of alleles have arisen through subgenome  
601 exchanges; and further, that these exchanges appear to be ongoing, as there are numerous  
602 differences between accessions, in the subgenome allele status at a given locus.

## 603 **Conclusions**

604 Genotype data for each accession in the U.S. peanut core collection will benefit peanut breeders  
605 in multiple ways: providing SNP data for use in marker-trait association studies to identify SNPs  
606 associated with important traits, describing the population structure of the core, and enabling  
607 breeders to work with smaller groups of accessions by selection through both phenotypic and  
608 genotypic characteristics. A probable ancestral genotypic group is identified, with most such  
609 accessions still coming from near the geographical origin of tetraploid peanut. The data also

610 provides information about the ongoing rapid changes in the peanut genome through subgenome  
611 exchanges, and supports theories about the origin, early cultivation, and dispersion of peanut  
612 throughout the world.

## 613 **Acknowledgements**

614 This project was supported by the Agriculture and Food Research Initiative Competitive Grant  
615 no. 2018-67013-28138 co-funded by the USDA National Institute of Food and Agriculture and  
616 the National Peanut Board. Mention of trade names or commercial products in this publication is  
617 solely for the purpose of providing specific information and does not imply recommendation or  
618 endorsement by the U.S. Department of Agriculture. USDA is an equal opportunity provider and  
619 Employer. We thank Dr Josh Clevenger for their insights regarding subgenome exchanges, Dr.  
620 H. Eric R. Olsen regarding Portuguese and Spanish colonial trade of peanut, Dr. Shyam Tallury  
621 for assistance with germplasm, and Dr. Naveen Puppala for permitting the use of NuMex-01  
622 before its public release.

## 623 **Literature Cited**

624 Altschul, S.F., W. Gish, W. Miller, E.W. Myers, and D.J. Lipman, 1990 Basic local alignment  
625 search tool. *Journal of molecular biology* 215 (3):403-410.  
626 Anon., 2000 Release of 'Jupiter' peanut. Oklahoma State University, Oklahoma Agricultural  
627 Experimental Station, USA.  
628 Baring, M.R., Y. Lopez, C.E. Simpson, J.M. Cason, J. Ayers *et al.*, 2006 Registration of 'Tamnut  
629 OL06' peanut. *Crop Science* 46 (6):2720-2721.  
630 Baring, M.R., C.E. Simpson, M.D. Burow, J.M. Cason, and J. Ayers, 2013 Registration of  
631 'Tamrun OL11' Peanut. *Journal of Plant Registrations* 7 (2):154.  
632 Belamkar, V., M.G. Selvaraj, J.L. Ayers, P.R. Payton, N. Puppala *et al.*, 2011 A first insight into  
633 population structure and linkage disequilibrium in the US peanut minicore collection.  
634 *Genetica* 139 (4):411.  
635 Bertoli, D.J., S.B. Cannon, L. Froenicke, G. Huang, A.D. Farmer *et al.*, 2016 The genome  
636 sequences of *Arachis duranensis* and *Arachis ipaensis*, the diploid ancestors of cultivated  
637 peanut. *Nature Genetics* 48:438.  
638 Bertoli, D.J., J. Jenkins, J. Clevenger, O. Dudchenko, D. Gao *et al.*, 2019 The genome sequence  
639 of segmental allotetraploid peanut *Arachis hypogaea*. *Nature genetics* 51 (5):877-884.

- 640 Bertioli, D.J., G. Seijo, F.O. Freitas, J.F. Valls, S.C. Leal-Bertioli *et al.*, 2011 An overview of  
641 peanut and its wild relatives. *Plant Genetic Resources* 9 (1):134-149.
- 642 Bird, C.E., S.A. Karl, P.E. Smouse, and R.J. Toonen, 2011 Detecting and measuring genetic  
643 differentiation. *Phylogeography and population genetics in Crustacea* 19 (3):1-55.
- 644 Branch, W., 2007a Registration of 'Georgia-06G' peanut. *Journal of Plant Registrations* 1  
645 (2):120-120.
- 646 Branch, W.D., 2007b Registration of 'Georgia-06G' Peanut. *Journal of Plant Registrations* 1  
647 (2):120-120.
- 648 Chamberlin, K., R. Bennett, J. Damicone, C. Godsey, H. Melouk *et al.*, 2015 Registration of  
649 'OLe' peanut. *Journal of Plant Registrations* 9 (2):154-158.
- 650 Chen, X., Q. Lu, H. Liu, J. Zhang, Y. Hong *et al.*, 2019 Sequencing of cultivated peanut, *Arachis*  
651 *hypogaea*, yields insights into genome evolution and oil improvement. *Molecular plant*  
652 12 (7):920-934.
- 653 Clevenger, J.P., W. Korani, P. Ozias-Akins, and S. Jackson, 2018 Haplotype-based genotyping  
654 in polyploids. *Frontiers in plant science* 9:564.
- 655 Cuc, L.M., E.S. Mace, J.H. Crouch, V.D. Quang, T.D. Long *et al.*, 2008 Isolation and  
656 characterization of novel microsatellite markers and their application for diversity  
657 assessment in cultivated groundnut (*Arachis hypogaea*). *BMC plant biology* 8 (1):55.
- 658 Dash, S., C.E.K. S., K.S. R, F.A. D., and C.S. B., 2016 PeanutBase and Other Bioinformatic  
659 Resources for Peanut.
- 660 Dean, L., K. Hendrix, C. Holbrook, and T. Sanders, 2009 Content of some nutrients in the core  
661 of the core of the peanut germplasm collection. *Peanut Science* 36 (2):104-120.
- 662 Ferguson, M., P. Bramel, and S. Chandra, 2004 Gene diversity among botanical varieties in  
663 peanut (*Arachis hypogaea* L.). *Crop Science* 44 (5):1847-1854.
- 664 Francis, R.M., 2017 pophelper: an R package and web app to analyse and visualize population  
665 structure. *Molecular Ecology Resources* 17 (1):27-32.
- 666 Freitas, F., M. Moretzsohn, and J. Valls, 2007 Genetic variability of Brazilian Indian landraces  
667 of *Arachis hypogaea* L. *Embrapa Recursos Genéticos e Biotecnologia-Artigo em*  
668 *periódico indexado (ALICE)*.
- 669 Gorbet, D., and B. Tillman, 2009 Registration of 'Florida-07' peanut. *Journal of Plant*  
670 *Registrations* 3 (1):14-18.
- 671 Goudet, J., 2005 Hierfstat, a package for R to compute and test hierarchical F<sub>st</sub> statistics.  
672 *Molecular Ecology Notes* 5 (1):184-186.
- 673 He, G., and C. Prakash, 2001 Evaluation of genetic relationships among botanical varieties of  
674 cultivated peanut (*Arachis hypogaea* L.) using AFLP markers. *Genetic Resources and*  
675 *Crop Evolution* 48 (4):347-352.
- 676 Hedrick, P.W., 1999 Perspective: highly variable loci and their interpretation in evolution and  
677 conservation. *evolution* 53 (2):313-318.
- 678 Holbrook, C.C., W.F. Anderson, and R.N. Pittman, 1993 Selection of a Core Collection from the  
679 U.S. Germplasm Collection of Peanut. *Crop Science* 33 (4):859-861.
- 680 Holbrook, C.C., and W. Dong, 2005 Development and Evaluation of a Mini Core Collection for  
681 the U.S. Peanut Germplasm Collection. *Crop Science* 45 (4):1540.
- 682 Holbrook, C.C., P. Timper, A.K. Culbreath, and C.K. Kvien, 2008 Registration of  
683 'Tifguard' peanut. *Journal of Plant Registrations* 2 (2):92-94.
- 684 Huson, D.H., and D. Bryant, 2006 Application of Phylogenetic Networks in Evolutionary  
685 Studies. *Molecular Biology and Evolution* 23 (2):254-267.



- 686 Isleib, T., S. Milla-Lewis, H. Pattee, S. C Copeland, C. Zuleta *et al.*, 2011 Registration of 'Bailey'  
687 *Peanut*.
- 688 Kassambara, A., 2016 ggcorrplot: Visualization of a Correlation Matrix using 'ggplot2'. *R*  
689 *package version 0.1.1*.
- 690 Korani, W., J.P. Clevenger, Y. Chu, and P. Ozias-Akins, 2019 Machine Learning as an Effective  
691 Method for Identifying True Single Nucleotide Polymorphisms in Polyploid Plants. *Plant*  
692 *Genome* 12 (1).
- 693 Krapovickas, A., 1969 The origin, variability and spread of the groundnut (*Arachis hypogaea*).  
694 Krapovickas, A., 1995 El origen y dispersión de las variedades del maní.
- 695 Krapovickas, A., and W.C. Gregory, 1994 Taxonomia del genero *Arachis* (Leguminosae).  
696 *Bonplandia* VIII:1-187.
- 697 Krapovickas, A., W.C. Gregory, D.E. Williams, and C.E. Simpson, 2007 Taxonomy of the genus  
698 *Arachis* (Leguminosae). *Bonplandia* 16:7-205.
- 699 Krapovickas, A., and R.O. Vanni, 2009 El maní de Lullaillaco. *Bonplandia* 18 (1):51-55.
- 700 Krapovickas, A., R.O. Vanni, J.R. Pietrarelli, D.E. Williams, and C.E. Simpson, 2009 Las razas  
701 de maní de Bolivia. *Bonplandia* 1:95-189.
- 702 Masur, L.J., J.-F. Millaire, and M. Blake, 2018 Peanuts and Power in the Andes: The Social  
703 Archaeology of Plant Remains from the Virú Valley, Peru. *Journal of Ethnobiology* 38  
704 (4):589-609.
- 705 Melouk, H.A., K. Chamberlin, C.B. Godsey, J. Damicone, M.D. Burow *et al.*, 2013 Registration  
706 of 'Red River Runner' peanut. *Journal of Plant Registrations* 7 (1):22-25.
- 707 Otyama, P.I., A. Wilkey, R. Kulkarni, T. Assefa, Y. Chu *et al.*, 2019 Evaluation of linkage  
708 disequilibrium, population structure, and genetic diversity in the US peanut mini core  
709 collection. *BMC genomics* 20 (1):481.
- 710 Pittman, R.N., 1995 United States peanut descriptors. *ARS (USA)*.
- 711 Price, M.N., P.S. Dehal, and A.P. Arkin, 2010 FastTree 2—approximately maximum-likelihood  
712 trees for large alignments. *PloS one* 5 (3).
- 713 Puppala, N., and S.P. Tallury, 2014 Registration of 'NuMex 01' High Oleic Valencia Peanut.  
714 *Journal of Plant Registrations* 8 (2):127.
- 715 Raina, S., V. Rani, T. Kojima, Y. Ogihara, K. Singh *et al.*, 2001 RAPD and ISSR fingerprints as  
716 useful genetic markers for analysis of genetic diversity, varietal identification, and  
717 phylogenetic relationships in peanut (*Arachis hypogaea*) cultivars and wild species.  
718 *Genome* 44 (5):763-772.
- 719 Raj, A., M. Stephens, and J.K. Pritchard, 2014 fastSTRUCTURE: Variational Inference of  
720 Population Structure in Large SNP Data Sets. *Genetics* 197 (2):573-589.
- 721 Rognes, T., T. Flouri, B. Nichols, C. Quince, and F. Mahé, 2016 VSEARCH: a versatile open  
722 source tool for metagenomics. *PeerJ* 4:e2584.
- 723 Simpson, C., M. Baring, A. Schubert, H. Melouk, Y. Lopez *et al.*, 2003 Registration  
724 of 'OLin' peanut. *Crop Science* 43 (5):1880-1882.
- 725 Simpson, C., A. Krapovickas, and J. Valls, 2001 History of *Arachis* including evidence of *A.*  
726 *hypogaea* L. progenitors. *Peanut Science* 28 (2):78-80.
- 727 Tallury, S., K. Hilu, S. Milla, S. Friend, M. Alsaghir *et al.*, 2005 Genomic affinities in *Arachis*  
728 section *Arachis* (Fabaceae): molecular and cytogenetic evidence. *Theoretical and Applied*  
729 *Genetics* 111 (7):1229-1237.
- 730 Tillman, B., and D. Gorbet, 2015 Registration of 'FloRun '107' peanut. *Journal of Plant*  
731 *Registrations* 9 (2):162-167.

- 732 Wang, M.L., S. Sukumaran, N.A. Barkley, Z. Chen, C.Y. Chen *et al.*, 2011 Population structure  
733 and marker–trait association analysis of the US peanut (*Arachis hypogaea* L.) mini-core  
734 collection. *Theoretical and Applied Genetics* 123 (8):1307-1317.
- 735 Weir, B.S., and C.C. Cockerham, 1984 Estimating F<sub>st</sub> statistics for the analysis of population  
736 structure. *evolution* 38 (6):1358-1370.
- 737 Zheng, X., D. Levine, J. Shen, S.M. Gogarten, C. Laurie *et al.*, 2012 A high-performance  
738 computing toolset for relatedness and principal component analysis of SNP data.  
739 *Bioinformatics* 28 (24):3326-3328.
- 740 Zhuang, W., H. Chen, M. Yang, J. Wang, M.K. Pandey *et al.*, 2019 The genome of cultivated  
741 peanut provides insight into legume karyotypes, polyploid evolution and crop  
742 domestication. *Nature Genetics* 51 (5):865-876.

743

## 744 **Figure legends**

745 **Figure 1** Phylogenetic tree for 1122 samples from 791 accessions of the U.S. peanut core  
746 collection. For reference, five clades have been assigned (1-4 and a transitional group, 3.2).  
747 These clade designations are also used in the network plot (Figure 2) and in the PCA analysis  
748 (Figure 4)

749 **Figure 2** Phylogenetic network of 1122 samples from 791 accessions of the U.S. peanut core  
750 collection. Network analysis was performed in SplitsTree using the NeighborNet algorithm with  
751 default settings. Accessions are ordered as in the phylogenetic clade analysis with four main  
752 clades shown in the figure.

753 **Figure 3** Genetic structure of 518 samples selected as representatives at  $\geq 98\%$  sequence  
754 identity. Accessions are grouped into five clusters represented by distinct colors. The X-axis  
755 represents accessions ordered according to their positions in the phylogenetic tree analysis. The  
756 Y-axis represents proportions of cluster assignment based on Q values from fastStructure  
757 analysis.



758 **Figure 4** Principal Component Analysis of 1120 samples based on 2063 unlinked SNP markers.

759 The X-axis represents PC 1 and the Y-axis represents PC 2. Samples are colored and grouped

760 according to: A. clade membership as defined in the phylogenetic and network analyses, B.

761 botanical varieties, C. market type, D. growth Habit, E. pod shape, and F. collection type

762 **Figure 5** Plots of  $F_{ST}$  (fixation index) values among genetic groupings, to determine

763 stratification in the core collection. Cluster identities are as shown in the phylogenetic and PCA

764 analyses. The pairwise population differentiation ( $F_{ST}$  index) was calculated using Hierfstat for a

765 set of unlinked markers and plotted as heatmaps. Accessions were classified into groups of: A.

766 clade membership as defined in the phylogenetic and network analyses, B. botanical varieties, C.

767 market type, D. growth Habit, E. pod shape, and F. continent of seed origin.

768 **Figure 6** Geographic origin of genotyped accessions. Colors indicate clades in Figure 1 (colors

769 and clade correspondences are shown in the legend in the lower left in the figure). Figure was

770 generated using the Germplasm GIS tool at peanutbase.org.

771 **Figure 7** Plot of inferred subgenome origins. Each colored region (gray or red) indicates data at

772 a SNP location. At each position, values are shown for 16 diverse accessions. In chromosomes

773 A01-A02 (left half), red indicates that alleles are the same as the B-genome assembly (A.

774 ipaensis) and different than the A-genome assembly (A duranensis), at the respective locations

775 (determined by perfect correspondence of flanking sequence). In chromosomes B01-B10 (right

776 half), red indicates that alleles are the same as the A-genome assembly (A. duranensis) and

777 different from the B-genome assembly (A ipaensis). Green marks on the chromosome backbones

778 (e.g. tops of A05 and B05) show the locations of large-scale subgenome invasion, observed in

779 the Tifrunner genome assembly (Bertioli et al., 2019).

780 **Table 1** Counts of genetically unique samples, relative to phenotypic traits. Unique samples are  
 781 listed in Supplementary File S1, worksheet “uniques”. Table 1A: counts of samples and  
 782 accessions per clade (relative to clades identified in Figure 1). Tables B-E: counts of unique  
 783 accessions per clade and per trait; trait classes as identified in table subheadings. Traits are per  
 784 Holbrook et al. (1993) and the Germplasm Resources Information Network (GRIN), as  
 785 indicated.

**A. Counts of samples and accessions**

| clade\ | samples | accessions |
|--------|---------|------------|
| 1      | 364     | 279        |
| 2      | 291     | 216        |
| 3      | 275     | 215        |
| 3.2    | 88      | 71         |
| 4      | 104     | 84         |

**B. Growth habit - Holbrook**

| clade\ | erect | bunch | spreading<br>bunch | mixed | spreading | prostrate | SUM |
|--------|-------|-------|--------------------|-------|-----------|-----------|-----|
| 1      | 12    | 9     | 12                 | 5     | 7         | 0         | 45  |
| 2      | 27    | 0     | 1                  | 3     | 0         | 0         | 31  |
| 3      | 25    | 1     | 1                  | 0     | 0         | 0         | 27  |
| 3.2    | 7     | 2     | 0                  | 0     | 0         | 0         | 9   |
| 4      | 13    | 0     | 1                  | 2     | 2         | 1         | 19  |

**Growth habit – Holbrook - percentage**

| clade\ | erect | bunch | spreading<br>bunch | mixed | spreading | prostrate | SUM  |
|--------|-------|-------|--------------------|-------|-----------|-----------|------|
| 1      | 26.7% | 20.0% | 26.7%              | 11.1% | 15.6%     | 0.0%      | 100% |
| 2      | 87.1% | 0.0%  | 3.2%               | 9.7%  | 0.0%      | 0.0%      | 100% |
| 3      | 92.6% | 3.7%  | 3.7%               | 0.0%  | 0.0%      | 0.0%      | 100% |
| 3.2    | 77.8% | 22.2% | 0.0%               | 0.0%  | 0.0%      | 0.0%      | 100% |
| 4      | 68.4% | 0.0%  | 5.3%               | 10.5% | 10.5%     | 5.3%      | 100% |

### C. Pod shape - Holbrook

| clade\ | fastigiata | mixed | hypogaea | vulgaris | SUM |
|--------|------------|-------|----------|----------|-----|
| 1      | 5          | 20    | 18       | 2        | 45  |
| 2      | 4          | 13    | 12       | 2        | 31  |
| 3      | 18         | 5     | 3        | 1        | 27  |
| 3.2    | 6          | 2     | 0        | 1        | 9   |
| 4      | 6          | 6     | 7        | 0        | 19  |

### Pod shape - Holbrook - percentage

| clade\ | fastigiata | mixed | hypogaea | Vulgaris | SUM  |
|--------|------------|-------|----------|----------|------|
| 1      | 11.1%      | 44.4% | 40.0%    | 4.4%     | 100% |
| 2      | 12.9%      | 41.9% | 38.7%    | 6.5%     | 100% |
| 3      | 66.7%      | 18.5% | 11.1%    | 3.7%     | 100% |
| 3.2    | 66.7%      | 22.2% | 0.0%     | 11.1%    | 100% |
| 4      | 31.6%      | 31.6% | 36.8%    | 0.0%     | 100% |

### D. Botanical type - GRIN

| clade\ | hypogaea | fastigiata | vulgaris | runner | aequatoriana | SUM |
|--------|----------|------------|----------|--------|--------------|-----|
| 1      | 3        | 2          | 0        | 0      | 0            | 5   |
| 2      | 0        | 10         | 2        | 0      | 0            | 12  |
| 3      | 2        | 68         | 6        | 0      | 0            | 76  |
| 3.2    | 1        | 17         | 0        | 0      | 0            | 18  |
| 4      | 32       | 7          | 0        | 0      | 2            | 41  |

### Botanical type - GRIN - percentage

| clade\ | hypogaea | fastigiata | vulgaris | runner | aequatoriana | SUM  |
|--------|----------|------------|----------|--------|--------------|------|
| 1      | 60.0%    | 40.0%      | 0.0%     | 0.0%   | 0.0%         | 100% |
| 2      | 0.0%     | 83.3%      | 16.7%    | 0.0%   | 0.0%         | 100% |
| 3      | 2.6%     | 89.5%      | 7.9%     | 0.0%   | 0.0%         | 100% |
| 3.2    | 5.6%     | 94.4%      | 0.0%     | 0.0%   | 0.0%         | 100% |
| 4      | 78.0%    | 17.1%      | 0.0%     | 0.0%   | 4.9%         | 100% |

### E. Market type

| clade\ | Mixed | Runner | Spanish | Unclass | Valencia | Virginia | SUM |
|--------|-------|--------|---------|---------|----------|----------|-----|
| 1      | 17    | 14     | 32      | 18      | 34       | 206      | 321 |
| 2      | 30    | 5      | 135     | 17      | 15       | 47       | 249 |
| 3      | 11    | 2      | 21      | 58      | 136      | 16       | 244 |
| 3.2    | 14    | 0      | 11      | 13      | 32       | 7        | 77  |
| 4      | 8     | 1      | 7       | 9       | 27       | 46       | 98  |
|        | 80    | 22     | 206     | 115     | 244      | 322      |     |

**Market type - percentage**

| clade\ | Mixed | Runner | Spanish | Unclass | Valencia | Virginia | SUM  |
|--------|-------|--------|---------|---------|----------|----------|------|
| 1      | 5.3%  | 4.4%   | 10.0%   | 5.6%    | 10.6%    | 64.2%    | 100% |
| 2      | 12.0% | 2.0%   | 54.2%   | 6.8%    | 6.0%     | 18.9%    | 100% |
| 3      | 4.5%  | 0.8%   | 8.6%    | 23.8%   | 55.7%    | 6.6%     | 100% |
| 3.2    | 18.2% | 0.0%   | 14.3%   | 16.9%   | 41.6%    | 9.1%     | 100% |
| 4      | 8.2%  | 1.0%   | 7.1%    | 9.2%    | 27.6%    | 46.9%    | 100% |

786 **Table 2** Counts of genetically unique samples, relative to geographic regions. Unique samples  
787 and countries and regions are listed in Supplementary File S1, worksheet “uniques.” Detailed  
788 counts (per country) are given in Supplementary File S1, worksheet “clade summary.” Columns  
789 labeled 1-4 indicate clades, as identified in Figure 1, and listed in File S1, worksheet “uniques.”

| Region \ clade                  | 1  | 2  | 3  | 3.2 | 4  |
|---------------------------------|----|----|----|-----|----|
| Africa - central                | 2  | 3  | 7  | 0   | 0  |
| Africa - north                  | 1  | 2  | 0  | 0   | 0  |
| Africa - northeast              | 12 | 13 | 4  | 2   | 0  |
| Africa - northwest              | 63 | 31 | 6  | 3   | 1  |
| Africa - south                  | 82 | 71 | 38 | 15  | 14 |
| Australia                       | 1  | 6  | 1  | 0   | 0  |
| China                           | 26 | 10 | 4  | 0   | 0  |
| Europe - east                   | 0  | 1  | 3  | 0   | 0  |
| Europe - south                  | 3  | 2  | 1  | 1   | 0  |
| India                           | 29 | 13 | 0  | 3   | 1  |
| Middleeast                      | 39 | 10 | 4  | 2   | 2  |
| North America                   | 20 | 5  | 9  | 1   | 1  |
| Northeast Asia                  | 5  | 6  | 4  | 0   | 0  |
| South America - north &<br>west | 16 | 20 | 11 | 21  | 67 |

|                              |    |    |     |    |    |
|------------------------------|----|----|-----|----|----|
| South America - south & east | 19 | 28 | 149 | 28 | 13 |
| Southeast Asia               | 3  | 26 | 2   | 1  | 0  |
| Soviet Union                 | 2  | 2  | 3   | 0  | 0  |

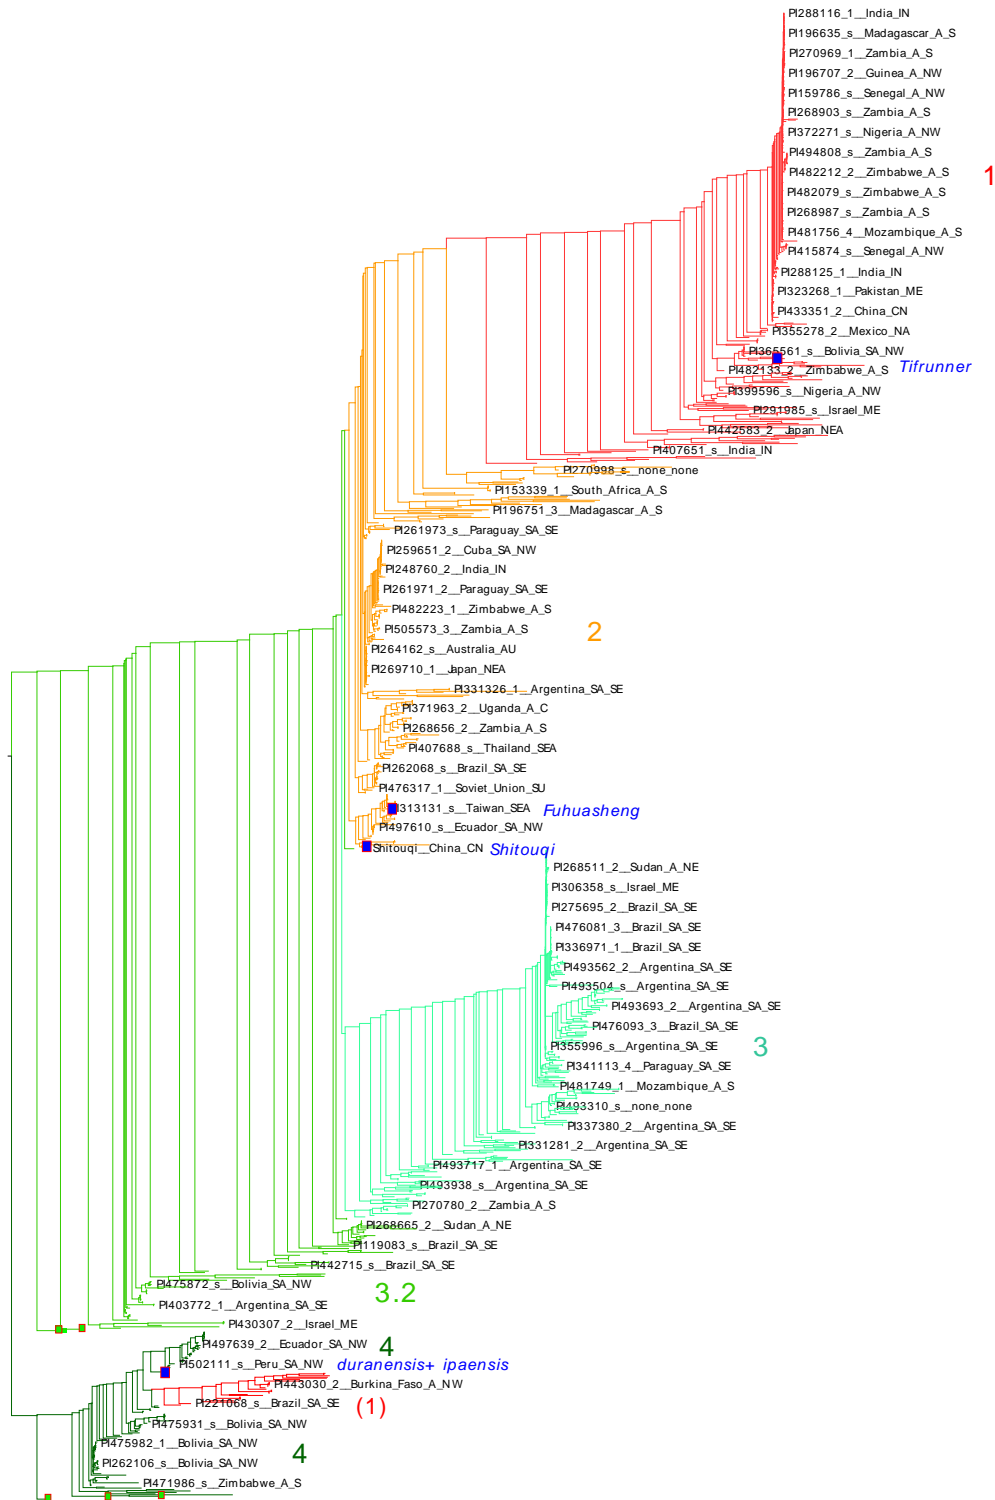

790  
791 **Figure 1**

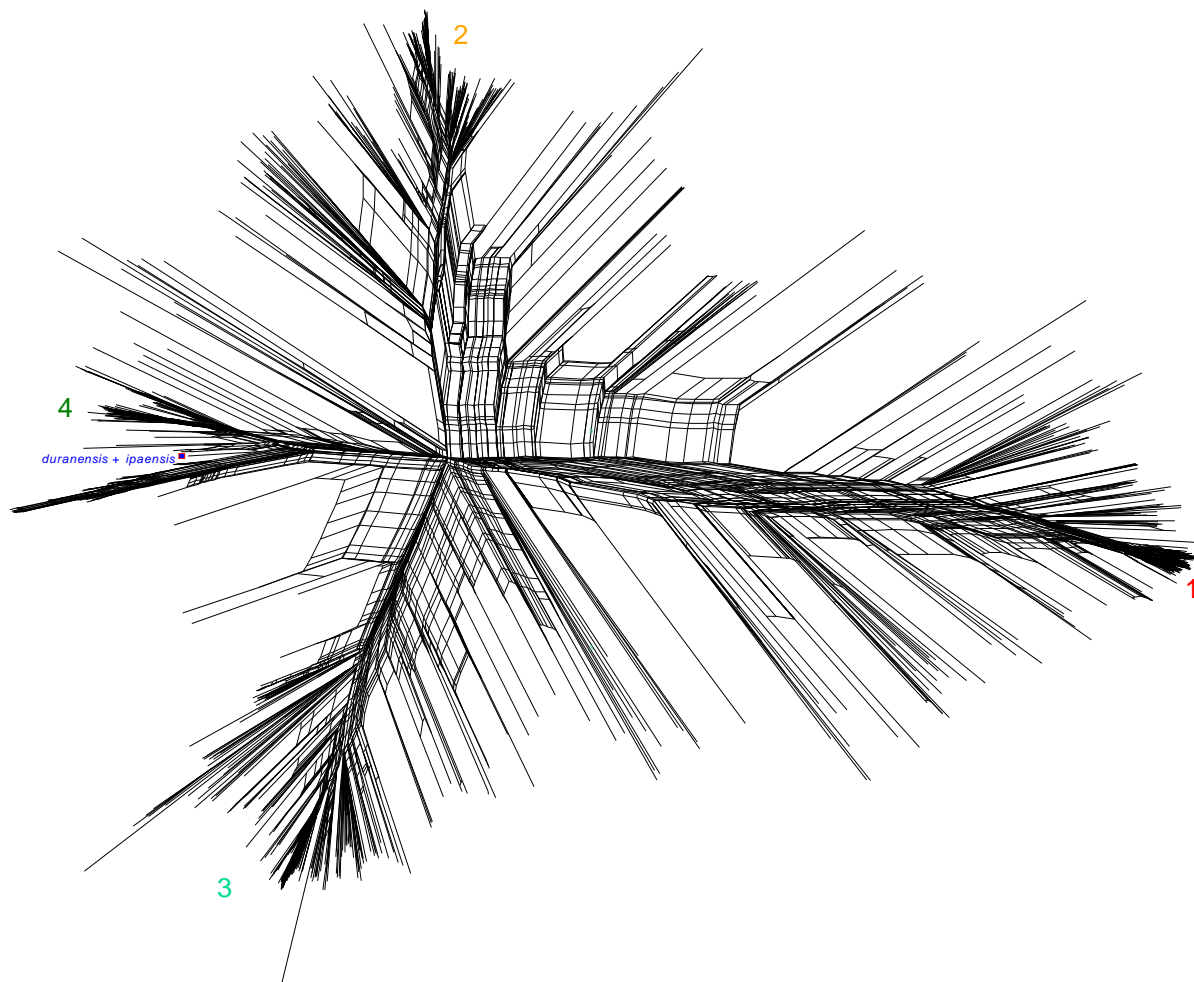

792  
793 **Figure 2**

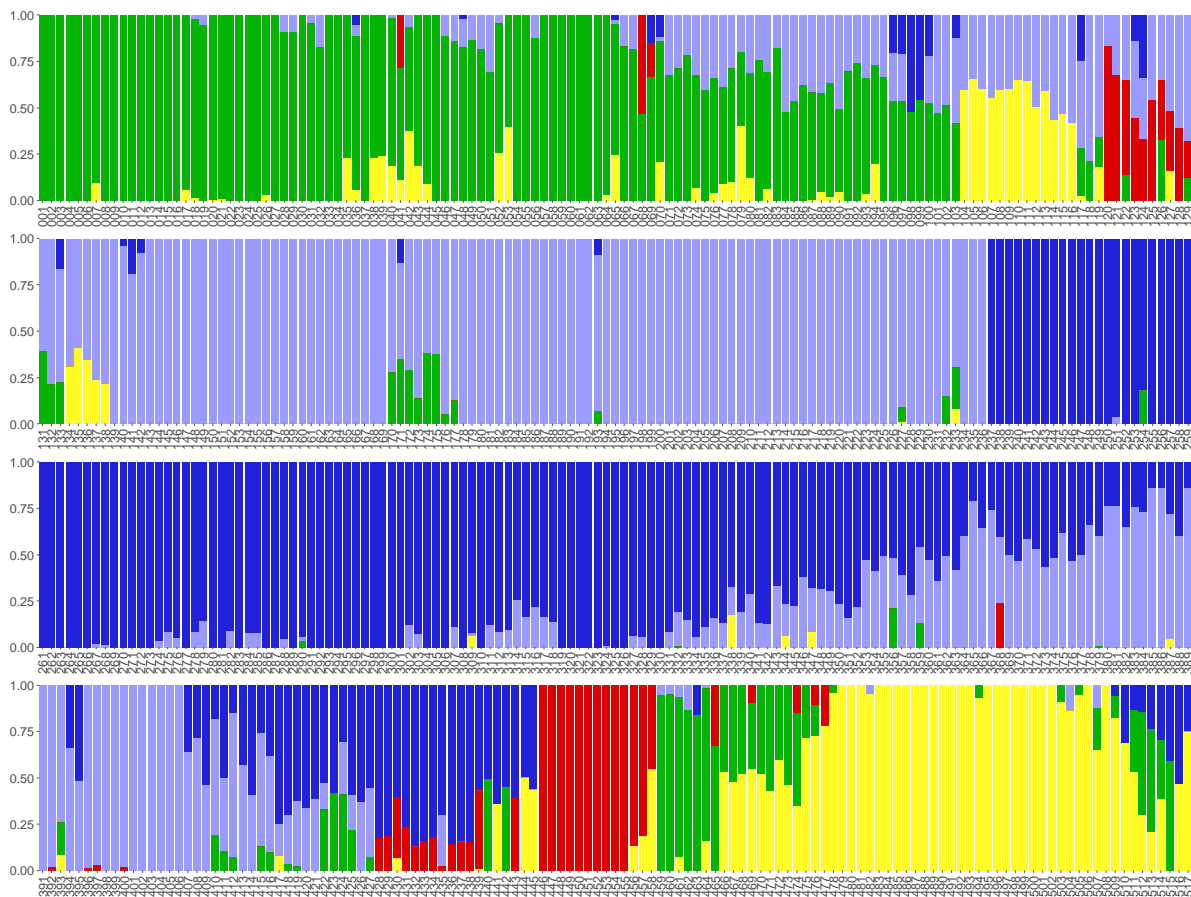

794  
795

**Figure 3**



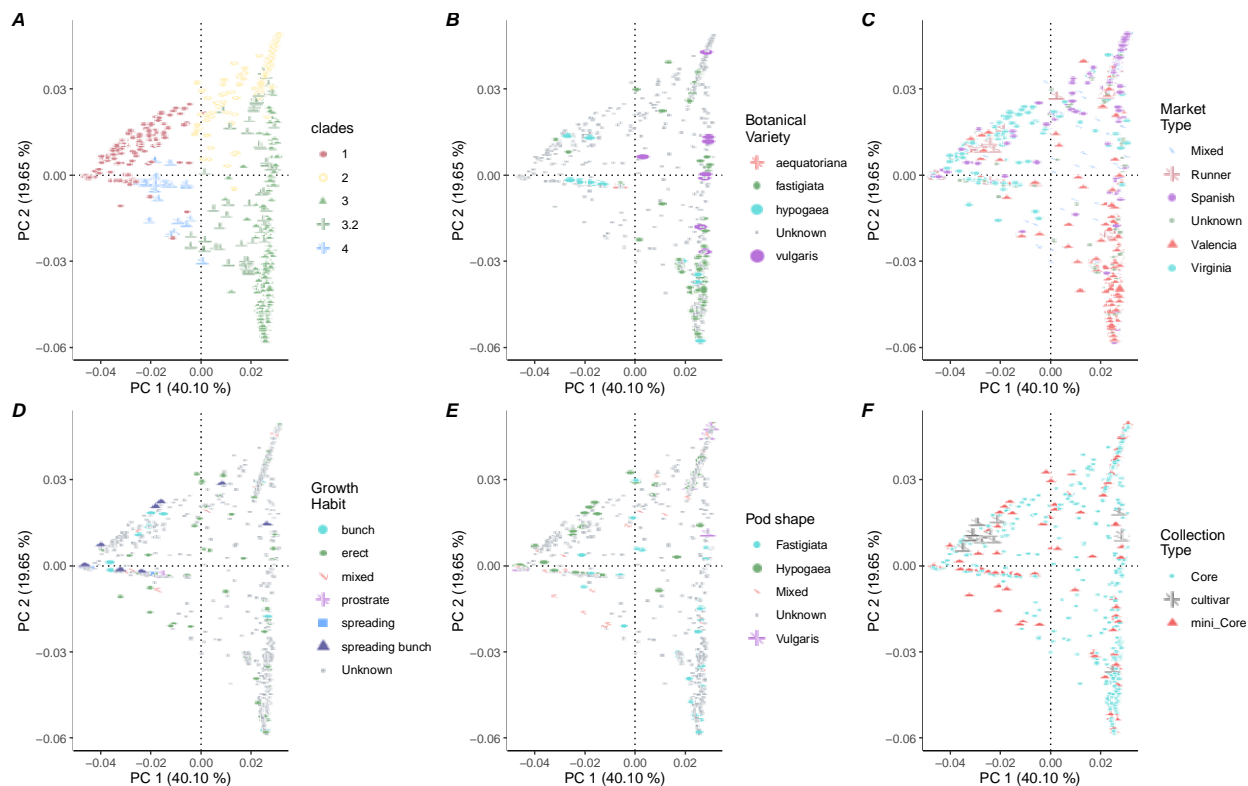

796  
797

**Figure 4**

798

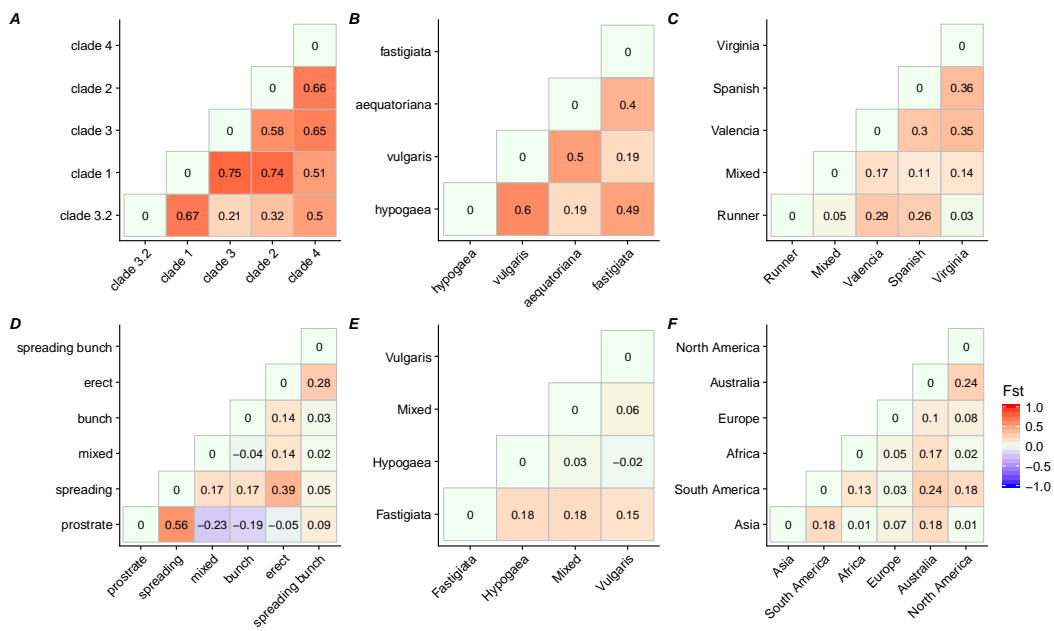

799  
800

**Figure 5**

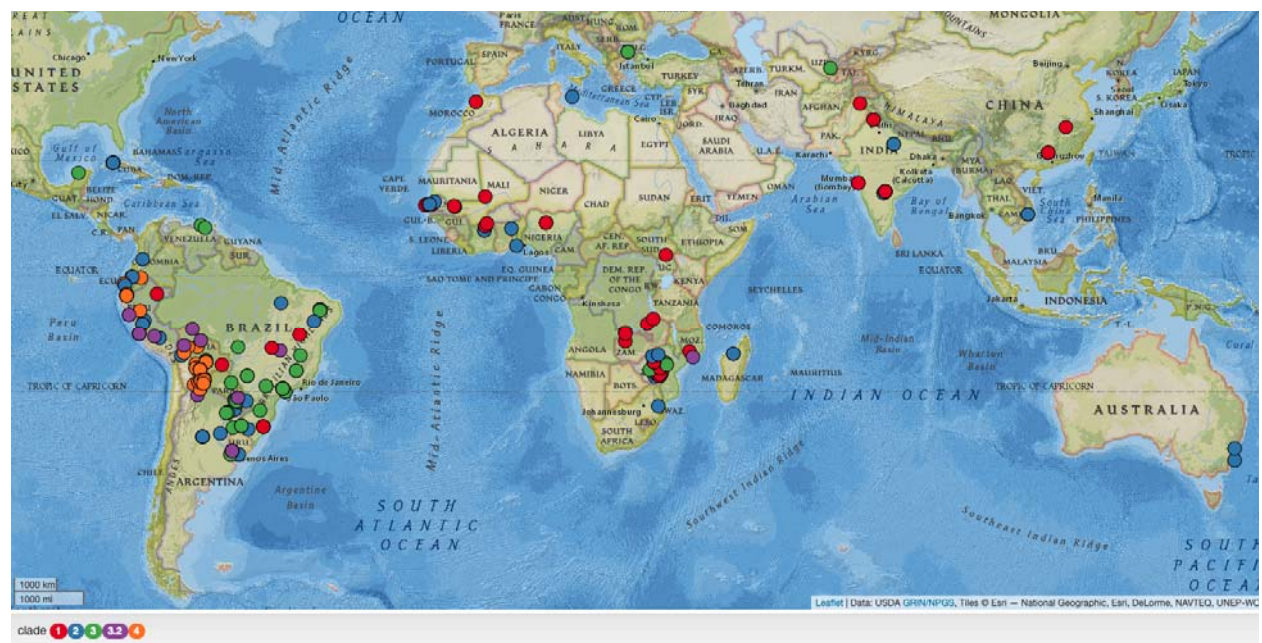

801  
802

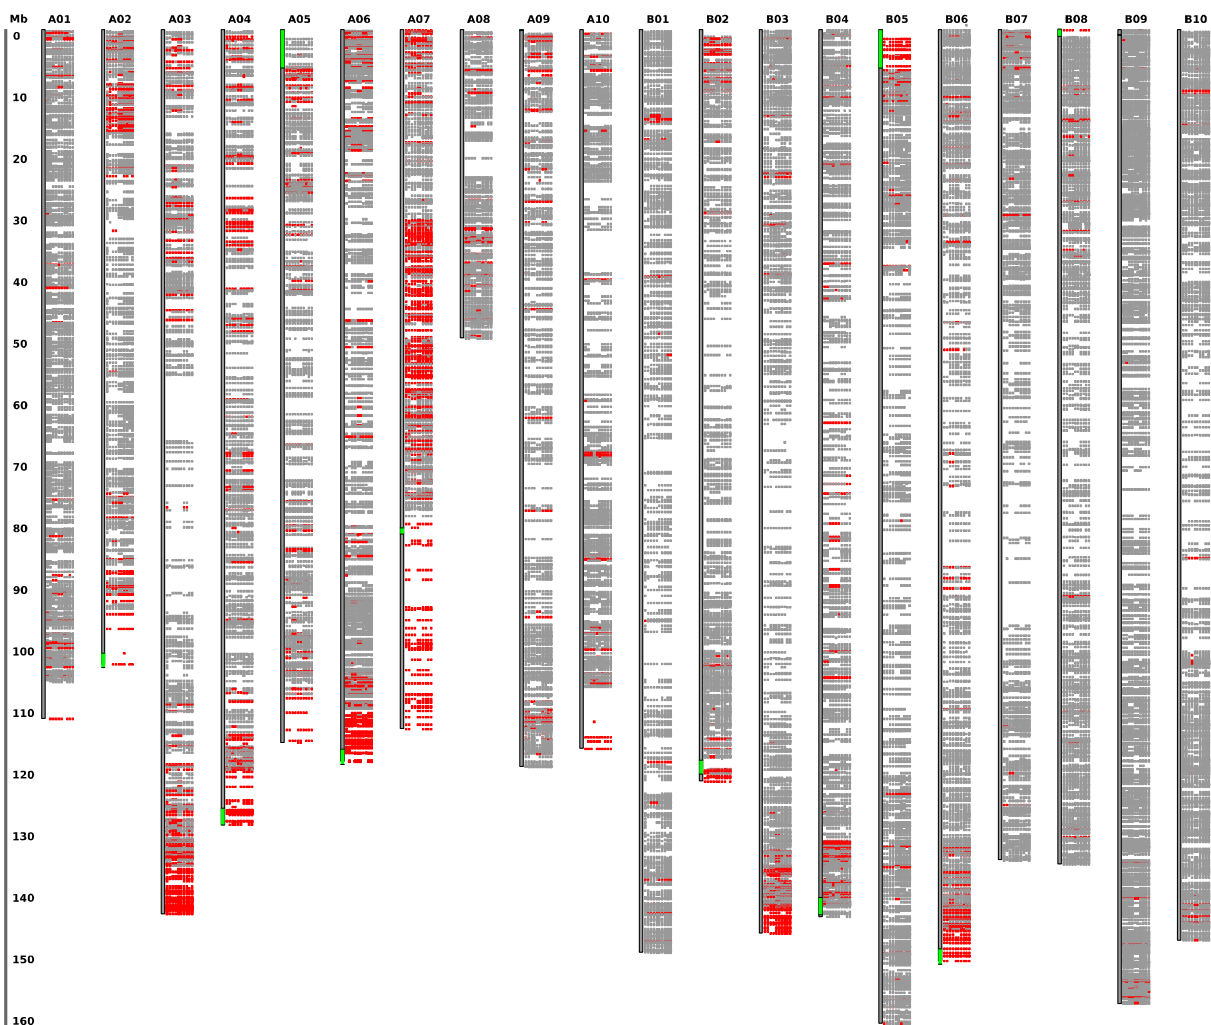

803  
804 **Figure 7**
